# Supplementary material for: Enhanced production of a single domain antibody with an engineered stabilizing extra disulfide bond
Source: PubMed Central journal article supplement (PMC4599338; doi:10.1186/s12934-015-0340-3), 2015-10-09
Supplement: 12934_2015_340_MOESM1_ESM.pdf [file 12934_2015_340_MOESM1_ESM.pdf]

**Additional file 1: Figure S1.** Isoelectric focusing gel of sdAb.

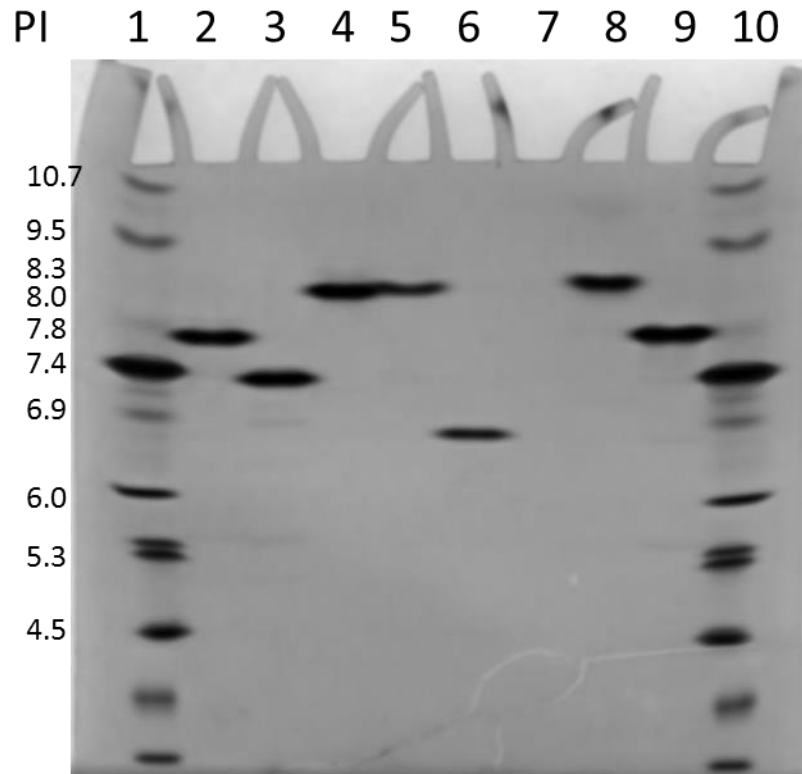

**Figure S1.** Measurement of isoelectric point using isoelectric focusing gel electrophoresis. Each well was loaded 10  $\mu$ g of sample, except 4  $\mu$ g of lane 5 sample was loaded. Lanes 1 and 10 represent the Serva pI marker (pH 3-10 from Life technologies Inc). Lane 2: Ac+neg; lane 3: AC+neg2; lane 4: AC+; lane 5: A3+; lane 6: A3+neg; lane 7: G2+; Lane 8: G2+neg; Lane 9: G2+neg2.
