# Supplementary material for: Enhanced production of a single domain antibody with an engineered stabilizing extra disulfide bond
Source: PubMed Central journal article supplement (PMC4599338; doi:10.1186/s12934-015-0340-3), 2015-10-09
Supplement: 12934_2015_340_MOESM2_ESM.pdf [file 12934_2015_340_MOESM2_ESM.pdf]

**Additional file 2: Figure S2.** Sequence alignment of sdAb A3 and variants.

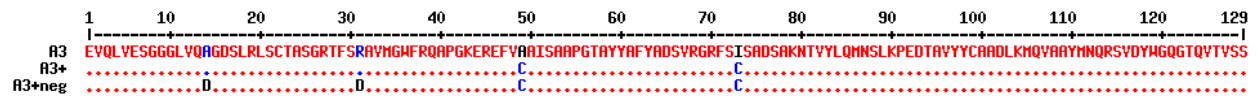

**Figure S2.** Sequence alignment of the SEB binding sdAb A3, A3+, and A3+neg using MultAlin [32]. The initial two amino acids (MA) and the amino acids added due to the restriction sites and the His-tag are not shown above (AAALEHHHHH).
